# Supplementary material
Source: PubMed Central journal article supplement (PMC3584174)
Supplement: NIHMS435849-supplement-supporting_file.pdf [file NIHMS435849-supplement-supporting_file.pdf]

# Supporting Information

## Characterization of small molecule binding. I. Accurate identification of strong inhibitors in virtual screening

*Bo Ding<sup>1</sup>, Jian Wang<sup>1</sup>, Nan Li<sup>1</sup> and Wei Wang<sup>1,2\*</sup>*

1. Department of Chemistry and Biochemistry, 2. Department of Cellular and  
Molecular Medicine, UCSD, La Jolla, CA 92093-0359

\*To whom correspondence should be addressed

Phone: 858-822-4240. Fax: 858-822-4236. E-mail: wei-wang@ucsd.edu

Table S1. Hydrophobic and hydrophilic atoms in the residues defined according to the functional group it belongs to.

Table S2 the best performance residue group.

Figure S1. Selection of the kernel function and the weight for the positive samples ( $K_+$ ) in SVM.

**Table S1. Hydrophobic and hydrophilic atoms in the residues defined according the functional group it belongs to.**

| Residue | Hydrophobic atom                                                    | Hydrophilic atom                              |
|---------|---------------------------------------------------------------------|-----------------------------------------------|
| Ala     | CA,HA,CB,1HB,2HB,3HB                                                | N,HN,C,O                                      |
| Cys     | CA,HA,CB,1HB,2HB                                                    | N,HN,C,O,SG,HG                                |
| Asp     | CA,HA,CB,1HB,2HB                                                    | N,HN,C,O,CG,OD1,OD2                           |
| Glu     | CA,HA,CB,1HB,2HB,CG,1HG,2HG                                         | N,HN,C,O,CD,OE1,OE2                           |
| Phe     | CA,HA,CB,1HB,2HB,CG,CD1,HD1,CD2,HD2,CE1,HE1,CE2,HE2,CZ,HZ           | N,HN,C,O                                      |
| Gly     | CA,1HA,2HA                                                          | N,HN,C,O                                      |
| His     | CA,HA,CB,1HB,2HB,CG,CD2,HD2,CE1,HE1                                 | N,HN,C,O,ND1,HD1(HD),NE2,HE2(HE)              |
| Ile     | CA,HA,CB,HB,CG1,1HG1,2HG1,CG2,1HG2,2HG2,3HG2,CD,1HD,2HD,3HD         | N,HN,C,O                                      |
| Lys     | CA,HA,CB,1HB,2HB,CG,1HG,2HG,CD,1HD,2HD,CE,1HE,2HE                   | N,HN,C,O,NZ,1HZ,2HZ,3HZ                       |
| Leu     | CA,HA,CB,1HB,2HB,CG,HG,CD1,1HD1,2HD1,3HD1,CD2,1HD2,2HD2,3HD2        | N,HN,C,O                                      |
| Met     | CA,HA,CB,1HB,2HB,CG,1HG,2HG,CE,1HE,2HE,3HE                          | N,HN,C,O,SG                                   |
| Asn     | CA,HA,CB,1HB,2HB                                                    | N,HN,C,O,CG,OD1,ND2,1HD2,2HD2                 |
| Pro     | CA,HA,CB,1HB,2HB,CG,1HG,2HG,CD,1HD,2HD                              | N,C,O                                         |
| Gln     | CA,HA,CB,1HB,2HB,CG,1HG,2HG                                         | N,HN,C,O,CD,OE1,NE2,HE2                       |
| Arg     | CA,HA,CB,1HB,2HB,CG,1HG,2HG,CD,1HD,2HD                              | N,HN,C,O,NE,HE,CZ,NH1,NH2,1HH1,2HH1,1HH2,2HH2 |
| Ser     | CA,HA,CB,1HB,2HB                                                    | N,HN,C,O,OG,HG                                |
| Thr     | CA,HA,CB,HB,CG2,1HG1,2HG2,3HG2                                      | N,HN,C,O,OG1,HG1                              |
| Val     | CA,HA,CB,HB,CG1,1HG1,2HG1,3HG1,CG2,1HG2,2HG2,3HG2                   | N,HN,C,O                                      |
| Trp     | CA,HA,CB,1HB,2HB,CG,CD1,HD1,CD2,CE2,CE3,HE3,CZ2,HZ2,CZ3,HZ3,CH2,HH2 | N,HN,C,O,NE1,HE1                              |
| Tyr     | CA,HA,CB,1HB,2HB,CG,CD1,HD1,CD2,HD2,CE1,HE1,CE2,HE2,CZ              | N,HN,C,O,OH,HH                                |

**Table S2 the best performance residue group**

| Chain | Positions                                                                                 |
|-------|-------------------------------------------------------------------------------------------|
| A     | 8R,9P,23L,26T,32V,47I,48G,51G,54I,81P,82V,86R,87N,90L,97L                                 |
| B     | 8R,9P,10L,23L,24L,25D,26T,29D,31T,33L,47I,48G,49G,50I,52G,54I,56V,76L,80T,83N,85I,86G,90L |

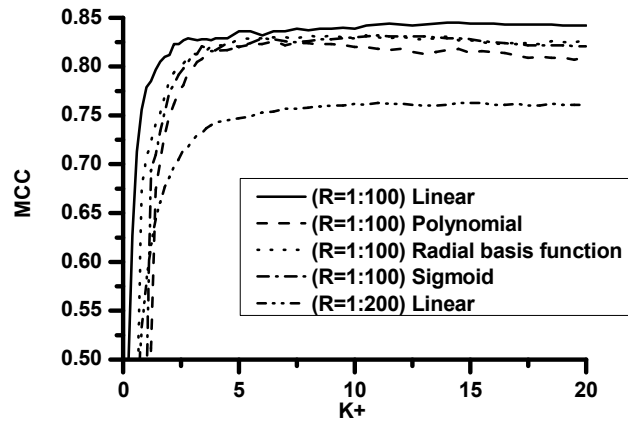

Figure S1. Selection of the kernel function and the weight for the positive samples ( $K_+$ ) in SVM.
